# Supplementary material for: Five-year Survival Analyses on Non-Pathological Complete Response Esophageal Squamous Cell Carcinoma Patients after Neoadjuvant Regimens plus Surgery: a Propensity Score Matching, Real-World Cohort Study
Source: Research Square preprint supplement (doi:10.21203/rs.3.rs-8484860/v1), 2026-01-29
Supplement: Supplementary file 1 [file 42e0d6ceedf298d686fbbc32.docx]

**Supplementary table 1. Univariable and multivariable Cox regression analyses for five-year overall survival (OS) before and after propensity score matching (PSM).**

| **Characteristic** | **Unmatched** | | | | | | **Matched** | | | | | |
| --- | --- | --- | --- | --- | --- | --- | --- | --- | --- | --- | --- | --- |
| **Univariable** | | | **Multivariable** | | | **Univariable** | | | **Multivariable** | | |
| **HR** | **95% CI** | **p-value** | **HR** | **95% CI** | **p-value** | **HR** | **95% CI** | **p-value** | **HR** | **95% CI** | **p-value** |
| **Group** |  |  |  |  |  |  |  |  |  |  |  |  |
| nCT | - | - |  |  |  |  | - | - |  |  |  |  |
| nICT | 1.00 | 0.76, 1.32 | 0.995 |  |  |  | 0.94 | 0.70, 1.27 | 0.707 |  |  |  |
| **PNI** |  |  |  |  |  |  |  |  |  |  |  |  |
| No | - | - |  | - | - |  | - | - |  | - | - |  |
| Yes | 1.90 | 1.43, 2.53 | <0.001*** | 2.17 | 1.42, 3.33 | <0.001*** | 1.99 | 1.47, 2.70 | <0.001*** | 1.66 | 1.17, 2.36 | 0.004** |
| **LVI** |  |  |  |  |  |  |  |  |  |  |  |  |
| No | - | - |  | - | - |  | - | - |  | - | - |  |
| Yes | 1.76 | 1.33, 2.33 | <0.001*** | 0.93 | 0.55, 1.56 | 0.781 | 1.80 | 1.34, 2.43 | <0.001*** | 0.92 | 0.62, 1.36 | 0.661 |
| **Histologic Grade** |  |  |  |  |  |  |  |  |  |  |  |  |
| G1 | - | - |  |  |  |  | - | - |  |  |  |  |
| G2 | 1.19 | 0.80, 1.76 | 0.394 |  |  |  | 1.18 | 0.78, 1.79 | 0.439 |  |  |  |
| G3 | 0.68 | 0.21, 2.24 | 0.530 |  |  |  | 0.70 | 0.21, 2.30 | 0.555 |  |  |  |
| **Ki-67 Group** |  |  |  |  |  |  |  |  |  |  |  |  |
| High | - | - |  | - | - |  | - | - |  |  |  |  |
| Low | 0.68 | 0.48, 0.96 | 0.027* | 0.82 | 0.56, 1.22 | 0.332 | 0.77 | 0.53, 1.11 | 0.162 |  |  |  |
| **Neoadjuvant treatment cycles** |  |  |  |  |  |  |  |  |  |  |  |  |
| ˃=3 | - | - |  |  |  |  | - | - |  |  |  |  |
| 1 | 1.12 | 0.62, 2.04 | 0.712 |  |  |  | 1.10 | 0.50, 2.44 | 0.810 |  |  |  |
| 2 | 1.05 | 0.67, 1.64 | 0.831 |  |  |  | 1.10 | 0.56, 2.15 | 0.787 |  |  |  |
| **Post_treatment** |  |  |  |  |  |  |  |  |  |  |  |  |
| No | - | - |  | - | - |  | - | - |  | - | - |  |
| Yes | 0.68 | 0.51, 0.90 | 0.008** | 0.47 | 0.31, 0.72 | <0.001*** | 0.69 | 0.51, 0.94 | 0.019* | 0.54 | 0.39, 0.77 | <0.001*** |
| **Surgical type** |  |  |  |  |  |  |  |  |  |  |  |  |
| MIE | - | - |  | - | - |  | - | - |  | - | - |  |
| OE | 1.53 | 1.14, 2.05 | 0.005** | 1.37 | 0.92, 2.03 | 0.121 | 1.59 | 1.17, 2.15 | 0.003** | 1.15 | 0.84, 1.58 | 0.372 |
| **Resection degree** |  |  |  |  |  |  |  |  |  |  |  |  |
| Non-R0 | - | - |  | - | - |  | - | - |  | - | - |  |
| R0 | 0.50 | 0.36, 0.70 | <0.001*** | 0.61 | 0.39, 0.97 | 0.038* | 0.47 | 0.33, 0.67 | <0.001*** | 0.70 | 0.47, 1.04 | 0.081 |
| **Tumor response** |  |  |  |  |  |  |  |  |  |  |  |  |
| MPR | - | - |  |  |  |  | - | - |  |  |  |  |
| PR | 1.21 | 0.78, 1.86 | 0.399 |  |  |  | 1.26 | 0.78, 2.06 | 0.346 |  |  |  |
| **ypT** |  |  |  |  |  |  |  |  |  |  |  |  |
| T0-2 | - | - |  | - | - |  | - | - |  | - | - |  |
| T3 | 1.75 | 1.26, 2.44 | <0.001*** | 1.07 | 0.65, 1.76 | 0.787 | 1.74 | 1.22, 2.49 | 0.002** | 1.33 | 0.88, 2.01 | 0.172 |
| T4 | 1.79 | 1.13, 2.82 | 0.013* | 1.96 | 1.08, 3.54 | 0.027* | 1.76 | 1.09, 2.85 | 0.020* | 1.61 | 0.96, 2.70 | 0.069 |
| **ypN** |  |  |  |  |  |  |  |  |  |  |  |  |
| N0 | - | - |  | - | - |  | - | - |  | - | - |  |
| N1 | 1.28 | 0.92, 1.78 | 0.146 | 1.10 | 0.66, 1.84 | 0.722 | 1.43 | 1.01, 2.03 | 0.045* | 1.36 | 0.88, 2.10 | 0.162 |
| N2-3 | 2.06 | 1.48, 2.86 | <0.001*** | 1.51 | 0.84, 2.72 | 0.166 | 2.27 | 1.60, 3.23 | <0.001*** | 1.46 | 0.93, 2.29 | 0.103 |
| **ypM** |  |  |  |  |  |  |  |  |  |  |  |  |
| M0 | - | - |  | - | - |  | - | - |  |  |  |  |
| M1(Lymph nodes) | 1.65 | 1.07, 2.55 | 0.024* | 1.06 | 0.59, 1.93 | 0.838 | 1.48 | 0.92, 2.38 | 0.107 |  |  |  |
| **Recurrence/metastasis** |  |  |  |  |  |  |  |  |  |  |  |  |
| No | - | - |  | - | - |  | - | - |  | - | - |  |
| Yes | 7.26 | 5.10, 10.32 | <0.001*** | 6.80 | 4.15, 11.13 | <0.001*** | 7.35 | 5.05, 10.72 | <0.001*** | 6.71 | 4.54, 9.91 | <0.001*** |
| 1*p<0.05; **p<0.01; ***p<0.001. Abbreviations: nICT, neoadjuvant immunochemotherapy; nCT, chemotherapy alone; CI, Confidence Interval; HR, Hazard Ratio; PNI, perineural invasion; LVI, lymphovascular invasion; MIE, Minimally Invasive Esophagectomy; OE, Open Esophagectomy; Post_treatment, postoperative adjuvant therapy. | | | | | | | | | | | | |

**Supplementary table 2. Univariable and multivariable Cox regression analyses for five-year event-free survival (EFS) before and after propensity score matching (PSM).**

| **Characteristic** | **Unmatched** | | | | | | **Matched** | | | | | |
| --- | --- | --- | --- | --- | --- | --- | --- | --- | --- | --- | --- | --- |
| **Univariable** | | | **Multivariable** | | | **Univariable** | | | **Multivariable** | | |
| **HR** | **95% CI** | **p-value1** | **HR** | **95% CI** | **p-value1** | **HR** | **95% CI** | **p-value** | **HR** | **95% CI** | **p-value** |
| **Group** |  |  |  |  |  |  |  |  |  |  |  |  |
| nCT | - | - |  | - | - |  | - | - |  | - | - |  |
| nICT | 0.73 | 0.56, 0.96 | 0.025* | 0.55 | 0.37, 0.81 | 0.003** | 0.74 | 0.55, 0.98 | 0.038* | 0.55 | 0.36, 0.84 | 0.005** |
| **PNI** |  |  |  |  |  |  |  |  |  |  |  |  |
| No | - | - |  | - | - |  | - | - |  | - | - |  |
| Yes | 1.64 | 1.24, 2.18 | <0.001*** | 1.93 | 1.26, 2.95 | 0.002** | 1.67 | 1.24, 2.24 | <0.001*** | 1.93 | 1.24, 3.00 | 0.003** |
| **LVI** |  |  |  |  |  |  |  |  |  |  |  |  |
| No | - | - |  | - | - |  | - | - |  | - | - |  |
| Yes | 1.99 | 1.51, 2.63 | <0.001*** | 1.49 | 0.92, 2.40 | 0.107 | 1.99 | 1.49, 2.65 | <0.001*** | 1.25 | 0.74, 2.11 | 0.411 |
| **Histologic Grade** |  |  |  |  |  |  |  |  |  |  |  |  |
| G1 | - | - |  |  |  |  | - | - |  | - | - |  |
| G2 | 1.12 | 0.76, 1.66 | 0.558 |  |  |  | 1.05 | 0.71, 1.56 | 0.807 | 0.92 | 0.56, 1.50 | 0.729 |
| G3 | 0.57 | 0.17, 1.87 | 0.353 |  |  |  | 0.52 | 0.16, 1.71 | 0.283 | 1.01 | 0.22, 4.51 | 0.994 |
| **Ki-67 Group** |  |  |  |  |  |  |  |  |  |  |  |  |
| High | - | - |  | - | - |  | - | - |  | - | - |  |
| Low | 0.65 | 0.46, 0.91 | 0.013* | 0.60 | 0.42, 0.87 | 0.006** | 0.73 | 0.51, 1.04 | 0.083 | 0.65 | 0.44, 0.97 | 0.035* |
| **Neoadjuvant treatment cycles** |  |  |  |  |  |  |  |  |  |  |  |  |
| ˃=3 | - | - |  |  |  |  | - | - |  | - | - |  |
| 1 | 1.12 | 0.61, 2.05 | 0.709 |  |  |  | 0.84 | 0.39, 1.82 | 0.664 | 0.56 | 0.19, 1.64 | 0.294 |
| 2 | 1.17 | 0.74, 1.85 | 0.493 |  |  |  | 0.96 | 0.51, 1.82 | 0.903 | 1.00 | 0.44, 2.27 | 0.997 |
| **Post_treatment** |  |  |  |  |  |  |  |  |  |  |  |  |
| No | - | - |  | - | - |  | - | - |  | - | - |  |
| Yes | 0.78 | 0.58, 1.04 | 0.087 | 0.59 | 0.39, 0.88 | 0.011* | 0.78 | 0.58, 1.05 | 0.103 | 0.57 | 0.36, 0.88 | 0.012* |
| **Surgical type** |  |  |  |  |  |  |  |  |  |  |  |  |
| MIE | - | - |  | - | - |  | - | - |  | - | - |  |
| OE | 1.76 | 1.32, 2.35 | <0.001*** | 1.80 | 1.22, 2.66 | 0.003** | 1.72 | 1.28, 2.32 | <0.001*** | 1.87 | 1.24, 2.83 | 0.003** |
| **Resection degree** |  |  |  |  |  |  |  |  |  |  |  |  |
| Non-R0 | - | - |  | - | - |  | - | - |  | - | - |  |
| R0 | 0.60 | 0.43, 0.84 | 0.003** | 0.67 | 0.42, 1.07 | 0.091 | 0.57 | 0.40, 0.81 | 0.002** | 0.67 | 0.41, 1.10 | 0.113 |
| **Tumor response** |  |  |  |  |  |  |  |  |  |  |  |  |
| MPR | - | - |  | - | - |  | - | - |  | - | - |  |
| PR | 1.45 | 0.93, 2.26 | 0.099 | 1.15 | 0.47, 2.77 | 0.761 | 1.50 | 0.92, 2.43 | 0.103 | 1.22 | 0.35, 4.30 | 0.756 |
| **ypT** |  |  |  |  |  |  |  |  |  |  |  |  |
| T0-2 | - | - |  | - | - |  | - | - |  | - | - |  |
| T3 | 1.62 | 1.17, 2.24 | 0.004** | 0.60 | 0.36, 0.99 | 0.047* | 1.61 | 1.14, 2.26 | 0.006** | 0.61 | 0.36, 1.03 | 0.066 |
| T4 | 1.82 | 1.16, 2.84 | 0.009** | 1.02 | 0.55, 1.87 | 0.951 | 1.76 | 1.11, 2.79 | 0.016* | 1.00 | 0.52, 1.90 | 0.995 |
| **ypN** |  |  |  |  |  |  |  |  |  |  |  |  |
| N0 | - | - |  | - | - |  | - | - |  | - | - |  |
| N1 | 1.38 | 0.99, 1.91 | 0.054 | 1.22 | 0.73, 2.04 | 0.455 | 1.52 | 1.08, 2.13 | 0.017* | 1.53 | 0.86, 2.71 | 0.149 |
| N2-3 | 2.22 | 1.60, 3.07 | <0.001*** | 1.90 | 1.12, 3.23 | 0.018* | 2.43 | 1.73, 3.42 | <0.001*** | 2.82 | 1.55, 5.11 | <0.001*** |
| **ypM** |  |  |  |  |  |  |  |  |  |  |  |  |
| M0 | - | - |  | - | - |  | - | - |  | - | - |  |
| M1(Lymph nodes) | 1.75 | 1.15, 2.65 | 0.009** | 1.73 | 1.00, 2.99 | 0.051 | 1.52 | 0.97, 2.40 | 0.068 | 1.17 | 0.62, 2.24 | 0.625 |
| 1*p<0.05; **p<0.01; ***p<0.001. Abbreviations: nICT, neoadjuvant immunochemotherapy; nCT, chemotherapy alone; CI, Confidence Interval; HR, Hazard Ratio; PNI, perineural invasion; LVI, lymphovascular invasion; MIE, Minimally Invasive Esophagectomy; OE, Open Esophagectomy; Post_treatment, postoperative adjuvant therapy. | | | | | | | | | | | | |
